# Supplementary material
Source: PubMed Central journal article supplement (PMC2488240)
Supplement: en.2008-0286_1.pdf [file en.2008-0286_1.pdf]

## Supplementary Data 1

The sequences of the oligonucleotide primers used for semi-quantitative RT-PCR are as follows:

*hGH For:* 5'-CCGACACCCTCCAACAGGGA-3'  
*hGH Rev:* 5'-CCTTGTCCATGTCCTTCCTG-3'  
*hGHR For:* 5'-CTCAACTGGACTTTACTGAACG-3'  
*hGHR Rev:* 5'-AATCTTTGGAAGTGGAACTGGG-3'  
 *$\beta$ -Actin For:* 5'-ATGATATCGCCGCGCTCG-3'  
 *$\beta$ -Actin Rev:* 5'-CGCTCGGTGAGGATCTTC A-3'
