# Supplementary material
Source: PubMed Central journal article supplement (PMC2488240)
Supplement: en.2008-0286_3.pdf [file en.2008-0286_3.pdf]

### Supplementary Data 3

The sequences of the oligonucleotide primers used for real-time PCR are as follows:

| <b>Gene</b>                                          | <b>Abbreviation</b> | <b>Primer</b> | <b>Primer Sequence (5'-3')</b>      | <b>Size</b> |
|------------------------------------------------------|---------------------|---------------|-------------------------------------|-------------|
| v-akt murine thymoma viral oncogene homolog 1        | AKT1                | For:          | GCACAAACGAGGGGAGTACAT               | 113 bp      |
|                                                      |                     | Rev:          | CCTCACGTTGGTCCACATC                 |             |
| Catenin (cadherin-associated protein), alpha-like 1  | $\alpha$ -catenin   | For:          | CCATGCAGGCAACATAAACTTC              | 105 bp      |
|                                                      |                     | Rev:          | AGGGTTGTAACCTGTGTAACAAG             |             |
| Ataxia telangiectasia mutated                        | ATM                 | For:          | TGGATCCAGCTATTTGGTTTGA              | 82 bp       |
|                                                      |                     | Rev:          | CCAAGTATGTAACCAACAATAGA<br>AGAAGTAG |             |
| BCL2-antagonist of cell death                        | BAD                 | For:          | CCCAGAGTTTGAGCCGAGTG                | 249 bp      |
|                                                      |                     | Rev:          | CCCATCCCTTCGTCGTCCT                 |             |
| BCL2-antagonist/killer 1                             | BAK1                | For:          | GAACAGGAGGCTGAAGGGGT                | 307 bp      |
|                                                      |                     | Rev:          | TCAGGCCATGCTGGTAGACG                |             |
| BCL2-associated X protein                            | BAX                 | For:          | GGGTGGTTGGGTGAGACTC                 | 199 bp      |
|                                                      |                     | Rev:          | AGACACGTAAGGAAAACGCATTA             |             |
| B-cell CLL/lymphoma 2                                | BCL2                | For:          | TCCGCATCAGGAAGGCTAGA                | 113 bp      |
|                                                      |                     | Rev:          | AGGACCAGGCCTCCAAGCT                 |             |
| BCL2-like 1                                          | BCL2L1              | For:          | ATGGCAGCAGTAAAGCAAGC                | 149 bp      |
|                                                      |                     | Rev:          | CGGAAGAGTTCATTCACTACCTGT            |             |
| BCL2-associated transcription factor 1               | BCLAF1              | For:          | TGGGACAAATACTGGTCCAAAC              | 62 bp       |
|                                                      |                     | Rev:          | CCTCTTCCTTCGGTCTCTTTTGA             |             |
| Beta-actin                                           | $\beta$ -actin      | For:          | TTCTGGGCATGGAGTC                    | 84 bp       |
|                                                      |                     | Rev:          | CAGGTCTTTGCGGATGTC                  |             |
| Catenin (cadherin-associated protein), beta 1, 88kDa | $\beta$ -catenin    | For:          | CCTATGCAGGGGTGGTCAAC                | 95 bp       |
|                                                      |                     | Rev:          | CGACCTGGAAAACGCCATCA                |             |
| Breast cancer 1, early onset                         | BRCA1               | For:          | CATGCTGAAACTTCTCAACCAGAA            | 81 bp       |
|                                                      |                     | Rev:          | TGTAGGCTCCTTTTGGTTATATCA<br>TTC     |             |
| Caspase 7, apoptosis-related cysteine peptidase      | CASP7               | For:          | AGTGACAGGTATGGGCGTTTCG              | 274 bp      |
|                                                      |                     | Rev:          | GCATCTATCCCCCTAAAGTGG               |             |
| Cyclin D1                                            | CCND1               | For:          | ACGAAGGTCTGCGCGTGTT                 | 323 bp      |
|                                                      |                     | Rev:          | CCGCTGGCCATGAACTACCT                |             |
| Cell division cycle 25A                              | CDC25A              | For:          | TAAGACCTGTATCTCGTGGCTG              | 131 bp      |
|                                                      |                     | Rev:          | CCCTGGTTCCTGCTATCTCT                |             |
| Cyclin-dependent kinase 2                            | CDK2                | For:          | GCTAGCAGACTTTGGACTAGCCAG            | 85 bp       |
|                                                      |                     | Rev:          | AGCTCGGTACCACAGGGTCA                |             |

|                                                                     |             |      |                                       |        |
|---------------------------------------------------------------------|-------------|------|---------------------------------------|--------|
| <i>Cyclin-dependent kinase 4</i>                                    | <i>CDK4</i> | For: | <i>CTGGTGTTTGAGCATGTAGACC</i>         | 102 bp |
|                                                                     |             | Rev: | <i>AAACTGGCGCATCAGATCCTT</i>          |        |
| Cyclin-dependent kinase inhibitor 1A (p21, Cip1)                    | CDKN1A      | For: | <i>CCTCATCCCCTGTTCTCCTTT</i>          | 97 bp  |
|                                                                     |             | Rev: | <i>GTACCACCCAGCGGACAAGT</i>           |        |
| Cyclin-dependent kinase inhibitor 2A (melanoma, p16, inhibits CDK4) | CDKN2A      | For: | <i>CAACGCACCGAATAGTTACGG</i>          | 96 bp  |
|                                                                     |             | Rev: | <i>AACTTCGTCCTCCAGAGTCGC</i>          |        |
| CASP8 and FADD-like apoptosis regulator                             | CFLAR       | For: | <i>GTGGAGACCCACCTGCTCA</i>            | 96 bp  |
|                                                                     |             | Rev: | <i>GGACACATCAGATTTATCCAAATC<br/>C</i> |        |
| CHK2 checkpoint homolog                                             | CHEK2       | For: | <i>AGTGGTGGGAATAAACGCC</i>            | 117 bp |
|                                                                     |             | Rev: | <i>TCTGGCTTTAAGTCACGGTGTA</i>         |        |
| Cyclin E1                                                           | CCNE1       | For: | <i>ATCAGCACTTTCTTGAGCAACA</i>         | 122 bp |
|                                                                     |             | Rev: | <i>TTGTGCCAAGTAAAAGGTCTCC</i>         |        |
| E2F transcription factor 1                                          | E2F1        | For: | <i>AGATGGTTATGGTGATCAAAGCC</i>        | 72 bp  |
|                                                                     |             | Rev: | <i>ATCTGAAAGTTCTCCGAAGAGTCC</i>       |        |
| v-erb-b2 erythroblastic leukemia viral oncogene homolog 2           | ERBB2       | For: | <i>ACTGGCCCTCATCCACCATA</i>           | 104 bp |
|                                                                     |             | Rev: | <i>GGTTGGCAGTGTGGAGCAG</i>            |        |
| v-ets erythroblastosis virus E26 oncogene homolog 2                 | ETS2        | For: | <i>CCCCTGTGGCTAACAGTTACA</i>          | 222 bp |
|                                                                     |             | Rev: | <i>AGGTAGCTTTTAAGGCTTGACTC</i>        |        |
| Fibronectin                                                         | FN1         | For: | <i>CCCATCAGCAGGAACACCTT</i>           | 84 bp  |
|                                                                     |             | Rev: | <i>GGCTCACTGCAAAGACTTTGAA</i>         |        |
| v-fos FBJ murine osteosarcoma viral oncogene homolog                | FOS         | For: | <i>TGCCCTCCTCAATGACCCTGA</i>          | 162 bp |
|                                                                     |             | Rev: | <i>ATAGGTCCATGTCTGGCACGGA</i>         |        |
| Glyceraldehyde-3-phosphate dehydrogenase                            | GAPDH       | For: | <i>TGCACCACCAACTGCTTAGC</i>           | 87 bp  |
|                                                                     |             | Rev: | <i>GGCATGGACTGTGGTCATGAG</i>          |        |
| Human growth hormone                                                | hGH1        | For: | <i>CAGGGAGGAAACACAACAGAAA</i>         | 155 bp |
|                                                                     |             | Rev: | <i>TTAGGAGGTCATAGACGTTGCT</i>         |        |
| Human growth hormone receptor                                       | hGHR        | For: | <i>GCTAACTAGCAATGGTGGTACAG</i>        | 103 bp |
|                                                                     |             | Rev: | <i>GACGTTTCAGTAAAGTCCAGTTGA</i>       |        |
| Granzyme A                                                          | GZMA        | For: | <i>ATCCTCTCTCAGTTGTCGTT</i>           | 116 bp |
|                                                                     |             | Rev: | <i>GACTAAGTAGGACCATGTAGGGT</i>        |        |
| homeo box A1                                                        | HOX-A1      | For: | <i>CGTGAGAAGGAGGGTCTCTTG</i>          | 147 bp |
|                                                                     |             | Rev: | <i>GTGGGAGGTAGTCAGAGTGTC</i>          |        |
| Hypoxanthine phosphoribosyltransferase                              | HPRT        | For: | <i>TGACACTGGCAAAACAATGCA</i>          | 94 bp  |
|                                                                     |             | Rev: | <i>GGTCCTTTTCACCAGCAAGCT</i>          |        |
| HIV-1 Tat interactive protein 2, 30kDa                              | HTATIP2     | For: | <i>CGGAGGGATTTGTTTCGTGTTG</i>         | 104 bp |
|                                                                     |             | Rev: | <i>AGCTCCTTTAGAGGATAGCAAGT</i>        |        |

|                                                                                     |            |      |                                             |        |
|-------------------------------------------------------------------------------------|------------|------|---------------------------------------------|--------|
| <i>v-jun sarcoma virus 17 oncogene homolog</i>                                      | <i>JUN</i> | For: | <i>CTCCAAGTGCCGAAAAAGGAAG</i>               | 118 bp |
|                                                                                     |            | Rev: | <i>CACCTGTTCCCTGAGCATGTTG</i>               |        |
| Mitogen-activated protein kinase kinase 1                                           | MAP2K1     | For: | <i>CAATGGCGGTGTGGTGTTC</i>                  | 114 bp |
|                                                                                     |            | Rev: | <i>AGCTCCCTTATGATCTGGTTCC</i>               |        |
| MET proto-oncogene (hepatocyte growth factor receptor)                              | MET        | For: | <i>TGGTGCAGAGGAGCAATGG</i>                  | 111 bp |
|                                                                                     |            | Rev: | <i>CATTCTGGATGGGTGTTCCG</i>                 |        |
| Matrix metalloproteinase 1                                                          | MMP1       | For: | <i>AGCTAGCTCAGGATGACATTGATG</i>             | 74 bp  |
|                                                                                     |            | Rev: | <i>GCCGATGGGCTGGACAG</i>                    |        |
| Matrix metalloproteinase 2                                                          | MMP2       | For: | <i>CAAAAACAAGAAGACATACATCT</i><br><i>T</i>  | 232 bp |
|                                                                                     |            | Rev: | <i>GCTTCCAAACTTCACGCTC</i>                  |        |
| Matrix metalloproteinase 9                                                          | MMP9       | For: | <i>TGGGGGGCAACTCGGC</i>                     | 224 bp |
|                                                                                     |            | Rev: | <i>GGAATGATCTAAGCCCAG</i>                   |        |
| Metastasis associated 1                                                             | MTA1       | For: | <i>GCTGTTACACCACACAGTCTT</i>                | 166 bp |
|                                                                                     |            | Rev: | <i>GGACTCATGTTACTGCGGTTT</i>                |        |
| Metastasis associated 2                                                             | MTA2       | For: | <i>CCGACGGCCTTATGCTCCT</i>                  | 145 bp |
|                                                                                     |            | Rev: | <i>CTGGGCCACCAGATCTTTGAC</i>                |        |
| <i>v-myc myelocytomatosis viral oncogene homolog (avian)</i>                        | MYC        | For: | <i>TGCTGCCAAGAGGGTCAAGT</i>                 | 118 bp |
|                                                                                     |            | Rev: | <i>GTGTGTTTCGCTCTTGACATTC</i>               |        |
| Nuclear factor of kappa light polypeptide gene enhancer in B-cells 1 (p105)         | NFKB1      | For: | <i>TGCCAACAGATGGCCATAC</i>                  | 123 bp |
|                                                                                     |            | Rev: | <i>TGTTCTTTTCACTAGAGGCACCA</i>              |        |
| Nuclear factor of kappa light polypeptide gene enhancer in B-cells inhibitor, alpha | NFKBIA     | For: | <i>CTCCGAGACTTTCGAGGAAATAC</i>              | 135 bp |
|                                                                                     |            | Rev: | <i>GCCATTGTAGTTGGTAGCCTTCA</i>              |        |
| Non-metastatic cells 1, protein (NM23A)                                             | NME1       | For: | <i>CTGCAGCCGGAGTTCAAAC</i>                  | 68 bp  |
|                                                                                     |            | Rev: | <i>GCAATGAAGGTACGCTCACAGT</i>               |        |
| Phosphoinositide-3-kinase, regulatory subunit 1 (p85 alpha)                         | PIK3R1     | For: | <i>GATTCTCAGCAGCCAGCTCTGAT</i>              | 91 bp  |
|                                                                                     |            | Rev: | <i>GCAGGCTGTCGTTCAATCCAT</i>                |        |
| Plasminogen activator, urokinase                                                    | PLAU       | For: | <i>CACGCAAGGGGAGATGAA</i>                   | 341 bp |
|                                                                                     |            | Rev: | <i>ACAGCATTGTTGGTGGTGACTT</i>               |        |
| Plasminogen activator, urokinase receptor                                           | PLAUR      | For: | <i>AATGGCCGCCAGTGTTACAG</i>                 | 227 bp |
|                                                                                     |            | Rev: | <i>CAGGAGACATCAATGTGGTTC</i>                |        |
| <i>v-raf-1 murine leukemia viral oncogene homolog 1</i>                             | RAF1       | For: | <i>TTTCTGGATCATGTTCCCCT</i>                 | 153 bp |
|                                                                                     |            | Rev: | <i>ACTTTGGTGCTACAGTGCTCA</i>                |        |
| Retinoblastoma 1                                                                    | RB1        | For: | <i>GAACATCGAATCATGGAATCCCT</i>              | 116 bp |
|                                                                                     |            | Rev: | <i>AGAGGACAAGCAGATTCAAGGTG</i><br><i>AT</i> |        |

|                                                                                      |               |      |                                 |        |
|--------------------------------------------------------------------------------------|---------------|------|---------------------------------|--------|
| <i>S100 calcium binding protein A4</i>                                               | <i>S100A4</i> | For: | <i>GATGAGCAACTTGGACAGCAA</i>    | 123 bp |
|                                                                                      |               | Rev: | <i>CTGGGCTGCTTATCTGGGAAG</i>    |        |
| Serpine peptidase inhibitor, clade B (ovalbumin), member 5                           | SERPINB5      | For: | <i>CTACTTTGTTGGCAAGTGGATGAA</i> | 90 bp  |
|                                                                                      |               | Rev: | <i>ACTGGTTTGGTGTCTGTCTTGTG</i>  |        |
| Serpine peptidase inhibitor, clade E (nexin, plasminogen activator inhibitor type 1) | SERPINE1      | For: | <i>CACAAATCAGACGGCAGCACT</i>    | 85 bp  |
|                                                                                      |               | Rev: | <i>CATCGGGCGTGGTGAAGTC</i>      |        |
| Synuclein, gamma (breast cancer-specific protein 1)                                  | SNCG          | For: | <i>TGAGCAGCGTCAACACTGTG</i>     | 64 bp  |
|                                                                                      |               | Rev: | <i>GAGGTGACCGCGATGTTCTC</i>     |        |
| Telomerase Rev transcriptase                                                         | TERT          | For: | <i>GGAGCAAGTTGCAAAGCATTG</i>    | 182 bp |
|                                                                                      |               | Rev: | <i>TCCCACGACGTAGTCCATGTT</i>    |        |
| Tumor necrosis factor receptor superfamily, member 10b                               | TNFRSF10B     | For: | <i>AAGACCCTTGTGCTCGTTGT</i>     | 144 bp |
|                                                                                      |               | Rev: | <i>AGGTGGACACAATCCCTCTG</i>     |        |
| Tumor necrosis factor receptor superfamily, member 1A                                | TNFRSF1A      | For: | <i>TGCCTACCCAGATTGAGAA</i>      | 169 bp |
|                                                                                      |               | Rev: | <i>ATTTCCCACAAACAATGGAGTAG</i>  |        |
| Tumor necrosis factor receptor superfamily, member 25                                | TNFRSF25      | For: | <i>ACTGCCAACCATGCCTAGACTG</i>   | 155 bp |
|                                                                                      |               | Rev: | <i>GAGCCTCCATCCCAGCTTC</i>      |        |
| Tumor protein p53 (Li-Fraumeni syndrome)                                             | TP53          | For: | <i>TGCAGCTGTGGGTTGATTCC</i>     | 396 bp |
|                                                                                      |               | Rev: | <i>AAACACGCACCTCAAAGCTGTTC</i>  |        |
